# Supplementary material for: Central obesity associates with renal hyperfiltration in the non-diabetic general population: a cross-sectional study
Source: BMC Nephrol. 2016 Nov 10;17:172. doi: 10.1186/s12882-016-0386-4 (PMC5103601; doi:10.1186/s12882-016-0386-4)
Supplement: Additional file 1: Table S1. — Regression models for the alternative renal hyperfiltration definitions. Table S2. mGFR cut-off points for renal hyperfiltration in male and female subjects from the study cohort with average height, weight and age. Table S3. Odds ratio for RHFheight, with body weight added as an independent variable. Table S4. Multiple linear regression with measured GFR and continuous obesity variables. (XLSX 22 kb) [file 12882_2016_386_MOESM1_ESM.xlsx]

## Sheet: S1
Table S1. Regression models for the alternative renal hyperfiltration definitions.
Regression model for RHFHeight
	Coefficient	P-value	95% confidence interval
ln (age)	-0.405836	0	0.528552	to	-0.283121
ln (height)	0.772771	0	0.545068	to	1.00047
Sex (Male =1)	0.167478	0	0.144166	to	0.190789
Constant	2.19205	0.001	0.882476	to	3.50162
R2=0.340
Regression model for RHFWeight/height
	Coefficient	P-value	95% confidence interval
ln (age)	-0.484814	0	0.601838	to	-0.367789
ln (height)	0.128093	0.287	0.107965	to	0.36415
ln (weight)	0.376169	0	0.320694	to	0.431645
Sex (Male =1)	0.143089	0	0.120678	to	0.165499
Constant	4.19708	0	2.91975	to	5.47442
R2=0.406
In both definitions, renal hyperfiltration was defined as a residual > 90th percentile in a multiple linear regression analysis with the independent variables listed above.
RHF: Renal hyperfiltration, ln: Natural logarithm, R2: Coefficient of determination

## Sheet: S2
Table S2. mGFR cut-off points for renal hyperfiltration in male and female subjects from the study cohort with average height, weight and age.
Sex	Age	Height (cm)	Weight (kg)	Absolute GFR cut-off point (mL/min)		BSA-adjusted GFR cut-off point (mL/min/1.73m2)
				RHFHeight	RHFWeight/height	RHFHeight	RHFWeight/height
Male	58	177	87	135.2	133.3	114.7	113
Female	58	165	72	108.4	106.6	104.7	103
mGFR: Measured glomerular filtration rate, BSA: Body surface area, RHF: Renal hyperfiltration

## Sheet: S3
Table S3. Odds ratio for RHFheight, with body weight added as an independent variable.
	Model 1						Model 2						Model 3						Model 4
	OR	CI			P		OR	CI			P		OR	CI			P		OR	CI			P
BMI <25 kg/m2	1	(ref)					1	(ref)					1	(ref)					1	(ref)
BMI 25-30 kg/m2	1.7204	0.931421	-	3.17771	0.0830891		1.68739	0.912891	-	3.11899	0.0950797		1.69502	0.912191	-	3.14966	0.0950695		1.67568	0.901229	-	3.11563	0.102823
BMI >30 kg/m2	3.16191	1.39617	-	7.16081	0.00577759		3.07592	1.35821	-	6.96598	0.00705859		3.01975	1.31693	-	6.92435	0.00904973		2.98853	1.30374	-	6.85054	0.00969155
BMI /5 kg/m2*	2.15531	1.39255	-	3.33587	0.000569394		2.11651	1.36576	-	3.27995	0.000794715		2.04166	1.3078	-	3.18732	0.00168512		2.03171	1.30069	-	3.17358	0.00183765
WC <80/94 cm	1	(ref)					1	(ref)					1	(ref)					1	(ref)
WC 80-88/94-102 cm	1.29387	0.626012	-	2.67421	0.486736		1.29546	0.626753	-	2.67763	0.484686		1.27128	0.613318	-	2.63512	0.518655		1.27474	0.61502	-	2.64214	0.513902
WC >88/102 cm	1.83099	0.866329	-	3.86983	0.113158		1.80661	0.854481	-	3.8197	0.121552		1.79327	0.844503	-	3.80795	0.128489		1.77893	0.837676	-	3.77783	0.13387
WC /10 cm*	1.4727	1.1035	-	1.96543	0.00856942		1.45743	1.09134	-	1.94634	0.0107055		1.40557	1.04936	-	1.8827	0.0224249		1.40128	1.04587	-	1.87748	0.023795
WHR <0,85/0,90	1	(ref)					1	(ref)					1	(ref)					1	(ref)
WHR >0,85/0,90	1.7554	1.02967	-	2.99264	0.0386988		1.7079	1.00055	-	2.91529	0.0497636		1.65345	0.965414	-	2.83183	0.0669887		1.62606	0.948721	-	2.787	0.0769809
WHR /0.10*	1.75432	1.25655	-	2.44929	0.000962712		1.70961	1.22303	-	2.38978	0.00170035		1.66797	1.18739	-	2.34307	0.00317271		1.64139	1.16762	-	2.30738	0.00434744
*Continuous variable
RHF: Renal hyperfiltration, BMI: Body mass index, WC: Waist circumference, WHR: Waist-hip ratio, OR: Odds ratio, CI: Confidence interval
Model 1: Adjustment for body weight, age, sex, number of cigarettes smoked daily, ambulatory daytime systolic and diastolic BP (and their interaction), and individual categories of antihypertensive medication
Model 2: Model 1 and a dichotomous variable for a metabolically unhealthy lipid profile, defined as HDL-cholesterol levels < 1.03 mmol/L in men or < 1.29 mmol/L in women, elevated triglyceride levels of ≥ 1.7 mmol/L, and/or use of lipid-lowering medication.
Model 3: Model 1 plus fasting plasma glucose and insulin levels, and HOMA-IR.
Model 4: All models combined

## Sheet: S4
Table S4. Multiple linear regression with measured GFR and continuous obesity variables.
	Absolute GFR (ml/min)
	Model 1						Model 2
	β	CI			P		β	CI			P
BMI /5kg/m²	6.67105	5.69596	-	7.64615	<0.001		5.62916	4.4372	-	6.82113	<0.001
WC /10cm	5.20439	4.49441	-	5.91437	<0.001		4.46539	3.62161	-	5.30917	<0.001
WHR /.10	6.2517	4.97925	-	7.52415	<0.001		4.13742	2.73848	-	5.53636	<0.001
	Body surface area-adjusted GFR (ml/min/1.73m2)
	Model 1						Model 2
	β	CI			P		β	CI			P
BMI /5kg/m²	-0.435876	1.30133	-	0.429579	0.323364		-0.849809	1.91024	-	0.21062	0.116174
WC /10cm	-0.288661	0.923678	-	0.346357	0.372725		-0.606651	1.36244	-	0.149141	0.11559
WHR /.10	0.846471	0.253622	-	1.94657	0.131431		0.678184	0.546459	-	1.90283	0.277537
Each row represents a separate regressions analysis.
GFR: Glomerular filtration rate, BMI: Body mass index, WC: Waist circumference, WHR: Waist-hip ratio, CI: Confidence interval
Model 1: Adjustment for age and sex
Model 2: Model 1 plus number of cigarettes smoked daily, ambulatory daytime systolic and diastolic BP (and their interaction), individual categories of antihypertensive medication, fasting plasma glucose and insulin levels, HOMA-IR, and a dichotomous variable for a metabolically unhealthy lipid profile, defined as HDL-cholesterol levels < 1.03 mmol/L in men or < 1.29 mmol/L in women, elevated tri…
